# Supplementary material for: Superior protein titers in half the fermentation time: Promoter and process engineering for the glucose‐regulated GTH1 promoter of Pichia pastoris
Source: PubMed Central journal article supplement — Biotechnol Bioeng. 2018 Aug 8;115(10):2479–88. doi: 10.1002/bit.26800 (PMC6221138; doi:10.1002/bit.26800), 2018-08-08
Supplement: BIT-115-2479-s002.pdf [file BIT-115-2479-s002.pdf]

Table S1: List of putative TFBS in pGTH1 predicted by Matinspector.

| Colour code | Matrix Family | Detailed Family Informator                                       | Matrix           | Detailed Matrix Informator                                                                                                                | Opt.        | Start       | End         | Position    | Anchor   | Position | Strand       | Core sim.    | Matrix sim.  | Mat. sim. - opt. | Sequence                         | Deletion            |
|-------------|---------------|------------------------------------------------------------------|------------------|-------------------------------------------------------------------------------------------------------------------------------------------|-------------|-------------|-------------|-------------|----------|----------|--------------|--------------|--------------|------------------|----------------------------------|---------------------|
|             | FSTEAF        | TEA/ATTS DNA binding domain factors                              | FSBAA0.01        | Aspergillus spore/developmental regulator                                                                                                 | 0.93        | -985        | -969        | -977        | -        | 1        | 0.94         | 0.01         | 0.01         | 0.01             | acctcaCATTTctactg                |                     |
|             | FSNRGF        | NRG zinc finger factors                                          | FSNRG1.01        | Transcriptional repressor Nrg1                                                                                                            | 0.89        | -976        | -964        | -970        | +        | 1        | 0.922        | 0.032        | 0.032        | 0.032            | tgtAGGtccc                       |                     |
|             | FSYSTR        | Yeast stress response elements                                   | FMSNZ2.01        | Transcriptional activator for genes in multistress response                                                                               | 1           | -956        | -942        | -949        | -        | 1        | 1            | 0            | 0            | 0                | gaactaGGGGGagcc                  |                     |
|             | FSPDRE        | Pleiotropic drug resistance responsive elements                  | FSPDRE.01        | Pleiotropic drug resistance responsive element (yeast)                                                                                    | 0.87        | -944        | -936        | -940        | -        | 0.773    | 1            | 0.007        | 0.007        | 0.007            | TCCGtgag                         |                     |
|             | FSYMAT        | Yeast mating factors                                             | FSHMR2.01        | Hidden Mat Right A2, a2 is one of two genes encoded by the a mating type cassette in S. cerevisiae                                        | 0.94        | -939        | -927        | -933        | +        | 1        | 0.947        | 0.007        | 0.007        | 0.007            | ggaaatGTGAaaa                    |                     |
|             | FSMADS        | Yeast MADS-Box factors                                           | FSRLM1.01        | Yeast MADS-Box RLM1 transcription factor                                                                                                  | 0.78        | -926        | -908        | -917        | -        | 1        | 0.873        | 0.003        | 0.003        | 0.003            | gtttTCtAGtaagata                 |                     |
|             | OSINRE        | Core promoter initiator elements                                 | OSDINR.01        | Drosophila initiator motifs                                                                                                               | 0.94        | -899        | -889        | -894        | +        | 1        | 0.974        | 0.034        | 0.034        | 0.034            | gcTCAgTgct                       |                     |
|             | FSRFXP        | Regulatory factor X protein, homologous to mammalian RFX1-5      | FSRFX1.02        | RFX1 (CRT1), acts by recruiting Ssn6 and Tup1, general repressors to the promoters of damage-inducible genes                              | 0.77        | -896        | -882        | -889        | -        | 1        | 0.811        | 0.041        | 0.041        | 0.041            | ttatctcaGAAcct                   |                     |
|             | FSHOMD        | Homeodomain-containing transcriptional regulators                | FSYOX1.02        | Yeast homeobox 1, homeodomain-containing transcriptional repressor                                                                        | 0.96        | -889        | -875        | -882        | -        | 1        | 0.968        | 0.008        | 0.008        | 0.008            | aacgtaAATTctctg                  |                     |
|             | FSHOMD        | Homeodomain-containing transcriptional regulators                | FSYOX1.02        | Yeast homeobox 1, homeodomain-containing transcriptional repressor                                                                        | 0.96        | -888        | -874        | -881        | +        | 1        | 0.992        | 0.032        | 0.032        | 0.032            | aggataATTAcctc                   |                     |
|             | OSMTEN        | Core promoter motif ten elements                                 | OSDMTE.01        | Drosophila motif ten element                                                                                                              | 0.77        | -888        | -868        | -878        | -        | 0.938    | 0.79         | 0.02         | 0.02         | 0.02             | acagtcgAACGtaattact              |                     |
|             | FSBZIP        | Fungal basic leucine zipper family                               | FSCS16.01        | Chromosome stability, bZIP transcription factor of the ATF/CREB family (ACA2)                                                             | 0.95        | -865        | -865        | -875        | -        | 1        | 0.965        | 0.015        | 0.015        | 0.015            | actaccggaACGtattact              |                     |
|             | FSMADS        | Yeast MADS-Box factors                                           | FSRLM1.01        | Yeast MADS-Box RLM1 transcription factor                                                                                                  | 0.78        | -855        | -837        | -846        | -        | 1        | 0.822        | 0.042        | 0.042        | 0.042            | lcttCTCAacataagat                |                     |
|             | FSYMAT        | Yeast mating factors                                             | FSMATALPHA2      | Homeodomain transcriptional repressor Mata1pha2                                                                                           | 0.86        | -853        | -841        | -847        | +        | 1        | 0.918        | 0.058        | 0.058        | 0.058            | ctgtaTTGtag                      |                     |
|             | FSMMAT        | M-box interacting with Mat1-Mc                                   | FSMAT1MC.01      | HMG-BOX protein interacts with M-box site, cooperativity with HMG-Box STE11 protein                                                       | 0.87        | -852        | -842        | -847        | +        | 1        | 0.895        | 0.025        | 0.025        | 0.025            | tgtATTGTgag                      |                     |
|             | FSSTPF        | STP gene family                                                  | FSSTP2.01        | Proteolytically activated transcription factor                                                                                            | 0.87        | -828        | -814        | -821        | -        | 1        | 0.966        | 0.096        | 0.096        | 0.096            | cgccgCCGtaaaaa                   |                     |
|             | FSSTPF        | STP gene family                                                  | FSSTP2.01        | Proteolytically activated transcription factor                                                                                            | 0.87        | -823        | -809        | -816        | +        | 1        | 0.912        | 0.042        | 0.042        | 0.042            | acgcccGCCccat                    |                     |
|             | <b>FSYADR</b> | <b>Yeast metabolic regulator</b>                                 | <b>FSADR1.01</b> | <b>Alcohol Dehydrogenase Regulator, carbon source-responsive zinc-finger transcription factor</b>                                         | <b>0.94</b> | <b>-785</b> | <b>-777</b> | <b>-781</b> | <b>+</b> | <b>1</b> | <b>0.984</b> | <b>0.044</b> | <b>0.044</b> | <b>0.044</b>     | <b>aaCCCact</b>                  | <b>-785 to -777</b> |
|             | FSRFXP        | Regulatory factor X protein, homologous to mammalian RFX1-5      | FSRFX1.02        | RFX1 (CRT1) is a DNA-binding protein that acts by recruiting Ssn6 and Tup1, general repressors to the promoters of damage-inducible genes | 0.92        | -763        | -749        | -756        | -        | 1        | 0.992        | 0.072        | 0.072        | 0.072            | cgglataGCCAacg                   |                     |
|             | FSYMCB        | Yeast Mlu I cell cycle box                                       | FSMW4.01         | DNA binding component of the SBF/SCB binding factor complex (Swi4p-Swi6p)                                                                 | 0.84        | -756        | -744        | -750        | +        | 1        | 0.88         | 0.04         | 0.04         | 0.04             | latacaCGCAc                      |                     |
|             | FSCYTO        | Activator of cytochrome C                                        | FSHAP1.01        | HAP1, S. cerevisiae member of GAL family, regulates heme dependent cytochrome expression                                                  | 0.76        | -715        | -701        | -708        | +        | 1        | 0.773        | 0.013        | 0.013        | 0.013            | ctgaagCATCGgtt                   |                     |
|             | FSFKHD        | Fungal fork head transcription factors                           | FSFKH1.01        | Fork head transcription factor Fkh1                                                                                                       | 0.81        | -709        | -693        | -701        | +        | 0.755    | 0.818        | 0.008        | 0.008        | 0.008            | lcatccgTTAAacatac                |                     |
|             | FSROX1        | Repressor of hypoxic genes                                       | FSROX1.01        | Heme-dependent transcriptional repressor of hypoxic genes                                                                                 | 0.82        | -704        | -692        | -698        | -        | 1        | 0.846        | 0.026        | 0.026        | 0.026            | ltgaTTGTtaacc                    |                     |
|             | FSYMAT        | Yeast mating factors                                             | FSMATALPHA2      | Homeodomain transcriptional repressor Mata1pha2                                                                                           | 0.86        | -703        | -691        | -697        | -        | 1        | 0.863        | 0.003        | 0.003        | 0.003            | ctgtaTTGtaacc                    |                     |
|             | FSMMAT        | M-box interacting with Mat1-Mc                                   | FSMAT1MC.01      | HMG-BOX protein interacts with M-box site, cooperativity with HMG-Box STE11 protein                                                       | 0.87        | -702        | -692        | -697        | -        | 1        | 0.931        | 0.061        | 0.061        | 0.061            | ltgATTGTtaacc                    |                     |
|             | FSYHSF        | Yeast heat shock factors                                         | FSHSF1.01        | Trimeric heat shock transcription factor                                                                                                  | 0.95        | -678        | -646        | -662        | -        | 1        | 0.958        | 0.008        | 0.008        | 0.008            | aacacactacgaatatGGAaaggaacaccgag |                     |
|             | FSPHD1        | Pseudoh yphal determinant 1                                      | FSPHD1.03        | Transcription factor involved in regulation of filamentous growth                                                                         | 0.98        | -635        | -623        | -629        | -        | 1        | 0.994        | 0.014        | 0.014        | 0.014            | lcaCATGCaacaa                    |                     |
|             | FSMCGM        | Monomeric Gal4-class motifs                                      | FSRG1.02         | Glucose-responsive transcription factor involved in regulation of glucose transport                                                       | 0.87        | -628        | -612        | -620        | +        | 1        | 0.944        | 0.074        | 0.074        | 0.074            | caactcGGCAaagattag               | -628 to -612        |
|             | FSCSRE        | Carbon source-responsive element                                 | FSCSRE.01        | Carbon source-responsive element (yeast)                                                                                                  | 0.79        | -626        | -612        | -619        | -        | 1        | 0.842        | 0.052        | 0.052        | 0.052            | ctaattCTCCGag                    |                     |
|             | FSYRSC        | Yeast transcription factors remodeling chromatin structure       | FSRSC3.01        | Component of the RSC chromatin remodeling complex                                                                                         | 0.82        | -614        | -594        | -604        | +        | 1        | 0.826        | 0.006        | 0.006        | 0.006            | tagcaatgCCGGttcata               |                     |
|             | FSYMCB        | Yeast Mlu I cell cycle box                                       | FSTUAP.01        | Aspergillus Stunted protein, (bHLH)-like structure, regulates multicellular complexity during asexual reproduction                        | 0.95        | -609        | -597        | -603        | -        | 1        | 0.951        | 0.001        | 0.001        | 0.001            | gaaaCGCCgtatt                    |                     |
|             | FSYMCB        | Yeast Mlu I cell cycle box                                       | FSMCSB.01        | Mlu I cell cycle box, activates G1/S-specific transcription (yeast)                                                                       | 0.84        | -608        | -596        | -602        | +        | 1        | 0.903        | 0.063        | 0.063        | 0.063            | atacCGCCttca                     |                     |
|             | FSDUIS        | DAL upstream induction sequence                                  | FSDAL82.01       | Transcriptional activator for allantoin catabolic genes                                                                                   | 0.92        | -597        | -589        | -593        | +        | 1        | 0.966        | 0.046        | 0.046        | 0.046            | cataTGCCgc                       |                     |
|             | FSPHD1        | Pseudoh yphal determinant 1                                      | FSPHD1.02        | Transcription factor involved in regulation of filamentous growth                                                                         | 0.97        | -597        | -585        | -591        | +        | 1        | 0.978        | 0.008        | 0.008        | 0.008            | cataTGCCgttt                     |                     |
|             | FSRDN         | RDNA binding factor                                              | FSREB1.02        | DNA enhancer/ binding protein I, termination factor for RNA polymerase I and transcription factor for RNA polymerase II                   | 0.85        | -589        | -577        | -583        | +        | 1        | 0.915        | 0.065        | 0.065        | 0.065            | chlTTACcccc                      |                     |
|             | <b>FSYMG</b>  | <b>Yeast GC-Box Proteins</b>                                     | <b>FSMG1.02</b>  | <b>MG1, zinc finger protein mediates glucose repression</b>                                                                               | <b>0.83</b> | <b>-568</b> | <b>-568</b> | <b>-577</b> | <b>-</b> | <b>1</b> | <b>0.839</b> | <b>0.009</b> | <b>0.009</b> | <b>0.009</b>     | <b>ttgacaaaGGGGGgtaa</b>         | <b>-568 to -568</b> |
|             | FSYSTR        | Yeast stress response elements                                   | FMSNZ2.01        | Transcriptional activator for genes in multistress response                                                                               | 1           | -566        | -572        | -579        | -        | 1        | 1            | 0            | 0            | 0                | caaaaGGGGgtaa                    |                     |
|             | FSBZIP        | Fungal basic leucine zipper family                               | FSYAP1.02        | Yeast activator protein of the basic leucine zipper (bZIP) family                                                                         | 0.93        | -565        | -565        | -575        | +        | 0.967    | 0.974        | 0.044        | 0.044        | 0.044            | taccocctcttTCTCAagcg             |                     |
|             | FSTALE        | Fungal TALE homeodomain class                                    | FSTOS8.01        | Homeodomain-containing transcription factor                                                                                               | 0.96        | -579        | -567        | -573        | +        | 1        | 0.962        | 0.002        | 0.002        | 0.002            | ctctttTCTCAag                    |                     |
|             | FSDUIS        | DAL upstream induction sequence                                  | FSDAL82.01       | Transcriptional activator for allantoin catabolic genes                                                                                   | 0.92        | -567        | -559        | -563        | -        | 1        | 0.975        | 0.055        | 0.055        | 0.055            | atattTGCgc                       |                     |
|             | <b>FSYMG</b>  | <b>Yeast GC-Box Proteins</b>                                     | <b>FSMG1.01</b>  | <b>MG1, zinc finger protein mediates glucose repression</b>                                                                               | <b>0.84</b> | <b>-553</b> | <b>-535</b> | <b>-544</b> | <b>+</b> | <b>1</b> | <b>0.852</b> | <b>0.012</b> | <b>0.012</b> | <b>0.012</b>     | <b>taagatttggGGGGgtgt</b>        | <b>-553 to -535</b> |
|             | FSYRAP        | Yeast activator of glycolysis genes / repressor of mating type I | FSRAP1.06        | RAP1 (TUF1), activator or repressor depending on context                                                                                  | 0.94        | -546        | -524        | -535        | -        | 1        | 0.967        | 0.027        | 0.027        | 0.027            | actaacgctcacCACccccca            |                     |
|             | FSIRT         | Iron-responsive transcriptional activators                       | FSAFT2.01        | Activator of Fe (iron) transcription 2, iron-regulated transcriptional activator                                                          | 0.98        | -543        | -529        | -536        | -        | 1        | 1            | 0.02         | 0.02         | 0.02             | cgccatCACCCca                    |                     |
|             | OSVTP         | Vertebrate TATA binding protein factor                           | OSATA0.01        | Avian C-type LTR TATA box                                                                                                                 | 0.78        | -530        | -514        | -522        | -        | 0.75     | 0.782        | 0.002        | 0.002        | 0.002            | tttttCACGtaaacg                  |                     |
|             | FSRPE         | Ribosomal RNA processing element                                 | FSTB3.01         | Ribosomal RNA processing element (RPE)-binding protein                                                                                    | 0.82        | -504        | -488        | -496        | -        | 1        | 0.875        | 0.055        | 0.055        | 0.055            | ttgacttTTTcaggga                 |                     |
|             | FSMCGM        | Monomeric Gal4-class motifs                                      | FSRG1.02         | Glucose-responsive transcription factor involved in regulation of glucose transport                                                       | 0.87        | -442        | -426        | -434        | -        | 0.793    | 0.893        | 0.023        | 0.023        | 0.023            | atataCGGAaaacatac                | -442 to -426        |
|             | FSGATA        | Fungal GATA binding factors                                      | FSGZF3.01        | GATA zinc finger protein Gz3                                                                                                              | 0.81        | -434        | -420        | -427        | +        | 1        | 0.817        | 0.007        | 0.007        | 0.007            | tcttGATatgatac                   |                     |
|             | FSPHD1        | Pseudoh yphal determinant 1                                      | FSPHD1.01        | Transcription factor involved in regulation of filamentous growth                                                                         | 0.89        | -430        | -418        | -424        | +        | 1        | 0.926        | 0.036        | 0.036        | 0.036            | gataTGCAtaaa                     |                     |
|             | FSYMAT        | Yeast mating factors                                             | FSMATA1.01       | Homeodomain protein mating factor a1                                                                                                      | 0.92        | -429        | -417        | -423        | -        | 1        | 0.921        | 0.001        | 0.001        | 0.001            | tttttTGCatac                     |                     |
|             | FSICGG        | Inverted CGG triplets spaced preferentially by 10 bp             | FSCH4.01         | Fungal zinc cluster transcription factor Cha4, single triplet                                                                             | 0.92        | -408        | -398        | -398        | +        | 1        | 0.922        | 0.002        | 0.002        | 0.002            | taaacacttattCTCCGctat            |                     |
|             | FSMCGM        | Monomeric Gal4-class motifs                                      | FSYRR1.01        | Zinc cluster transcription factor, activates genes involved in multidrug resistance (PDR2)                                                | 0.76        | -403        | -387        | -395        | -        | 1        | 0.807        | 0.047        | 0.047        | 0.047            | aatagCGGAagattcag                |                     |
|             | FSRDR1        | Repressor of Drug Resistance 1                                   | FSRDR1.01        | Repressor of Drug Resistance 1 (transcriptional repressor involved in the control of multidrug resistance)                                | 0.89        | -399        | -389        | -394        | -        | 1        | 0.915        | 0.025        | 0.025        | 0.025            | taqCGAagat                       |                     |
|             | FSRFXP        | Regulatory factor X protein, homologous to mammalian RFX1-5      | FSRFX1.02        | RFX1 (CRT1), acts by recruiting Ssn6 and Tup1, general repressors to the promoters of damage-inducible genes                              | 0.77        | -366        | -352        | -359        | -        | 0.78     | 0.782        | 0.012        | 0.012        | 0.012            | ttgtcacgaAAcGg                   |                     |
|             | FSYMCB        | Yeast Mlu I cell cycle box                                       | FSSW4.01         | DNA binding component of the SBF/SCB binding factor complex (Swi4p-Swi6p)                                                                 | 0.84        | -364        | -352        | -358        | -        | 1        | 0.887        | 0.047        | 0.047        | 0.047            | tttgcaCGAAac                     |                     |
|             | FSBZIP        | Fungal basic leucine zipper family                               | FSYAP1.02        | Yeast activator protein of the basic leucine zipper (bZIP) family                                                                         | 0.93        | -361        | -345        | -353        | -        | 0.967    | 0.974        | 0.044        | 0.044        | 0.044            | ltgaaaattaaattGTCACgaa           |                     |
|             | FSRPE         | Ribosomal RNA processing element                                 | FSTB3.01         | Ribosomal RNA processing element (RPE)-binding protein                                                                                    | 0.82        | -359        | -347        | -353        | -        | 0.752    | 0.823        | 0.003        | 0.003        | 0.003            | aaattattTGTCTCagca               |                     |
|             | FSRTALE       | Fungal TALE homeodomain class                                    | FSCS16.01        | Homeodomain transcriptional repressor Cup9                                                                                                | 0.98        | -341        | -341        | -351        | -        | 1        | 0.989        | 0.019        | 0.019        | 0.019            | ttatTTGCaac                      |                     |
|             | FSHOMD        | Homeodomain-containing transcriptional regulators                | FSYOX1.01        | Yeast homeobox 1, homeodomain-containing transcriptional repressor                                                                        | 0.86        | -358        | -344        | -351        | -        | 1        | 0.886        | 0.026        | 0.026        | 0.026            | aaattAATTgtcac                   |                     |
|             | FSHOMD        | Homeodomain-containing transcriptional regulators                | FSYOX1.01        | Yeast homeobox 1, homeodomain-containing transcriptional repressor                                                                        | 0.86        | -357        | -343        | -350        | +        | 1        | 0.879        | 0.019        | 0.019        | 0.019            | tgacaAATTAatttc                  |                     |
|             | FSICGG        | Inverted CGG triplets spaced preferentially by 10 bp             | FSTEA1.01        | Ty1 enhancer activator, zinc cluster DNA-binding protein                                                                                  | 0.75        | -357        | -337        | -347        | +        | 1        | 0.789        | 0.039        | 0.039        | 0.039            | tgacaAAATTAattccaag              |                     |
|             | FSMCGM        | Monomeric Gal4-class motifs                                      | FSYRR1.01        | Zinc cluster transcription factor, activates genes involved in multidrug resistance (PDR2)                                                | 0.76        | -352        | -336        | -344        | -        | 0.753    | 0.763        | 0.003        | 0.003        | 0.003            | ccogTTGAaattaat                  |                     |
|             | FSASG1        | Activator of stress genes                                        | FSASG1.01        | Fungal zinc cluster transcription factor Asg1                                                                                             | 0.79        | -340        | -324        | -332        | -        | 1        | 0.835        | 0.045        | 0.045        | 0.045            | lCCGGCaagaccocgt                 |                     |
|             | <b>FSMCGM</b> | <b>Monomeric Gal4-class motifs</b>                               | <b>FSRG1.02</b>  | <b>Glucose-responsive transcription factor involved in regulation of glucose transport</b>                                                | <b>0.87</b> | <b>-335</b> | <b>-321</b> | <b>-329</b> | <b>-</b> | <b>1</b> | <b>0.88</b>  | <b>0.01</b>  | <b>0.01</b>  | <b>0.01</b>      | <b>ttatcCGGAaagacc</b>           | <b>-337 to -316</b> |
|             | <b>FSMCGM</b> | <b>Monomeric Gal4-class motifs</b>                               | <b>FSRG1.02</b>  | <b>Glucose-responsive transcription factor involved in regulation of glucose transport</b>                                                | <b>0.87</b> | <b>-330</b> | <b>-320</b> | <b>-325</b> | <b>+</b> | <b>1</b> | <b>0.885</b> | <b>0.015</b> | <b>0.015</b> | <b>0.015</b>     | <b>ttgtcCGAataagaaa</b>          |                     |
|             | FSRDR1        | Repressor of Drug Resistance 1                                   | FSRDR1.01        | Repressor of Drug Resistance 1 (transcriptional repressor involved in the control of multidrug resistance)                                | 0.89        | -332        | -316        | -324        | +        | 1        | 0.9          | 0.01         | 0.01         | 0.01             | gtCCGAlaag                       |                     |
|             | FSGATA        | Fungal GATA binding factors                                      | FSGATA.01        | GATA binding factor (yeast)                                                                                                               | 0.89        | -329        | -315        | -322        | +        | 1        | 0.974        | 0.084        | 0.084        | 0.084            | ttccGATAAaggaat                  |                     |
|             | FSP           |                                                                  |                  |                                                                                                                                           |             |             |             |             |          |          |              |              |              |                  |                                  |                     |

|        |                                                                  |             |                                                                                                                                               |      |      |      |      |   |       |       |       |                          |              |
|--------|------------------------------------------------------------------|-------------|-----------------------------------------------------------------------------------------------------------------------------------------------|------|------|------|------|---|-------|-------|-------|--------------------------|--------------|
| FSCSRE | Carbon source-responsive elements                                | FSCSRE.01   | Carbon source-responsive element (yeast)                                                                                                      | 0.79 | -276 | -260 | -268 | + | 1     | 0.81  | 0.02  | catatttTCCGgtt           |              |
| FMSGCM | Monomeric Gal4-class motifs                                      | FSGRT1.01   | Glucose-responsive transcription factor involved in regulation of glucose transport                                                           | 0.82 | -275 | -259 | -267 | - | 1     | 0.982 | 0.162 | ataacCGAaaaatg           | -275 to -261 |
| FICGG  | Inverted CGG triplets spaced preferentially by 10 bp             | FSTEA1.01   | Ty1 enhancer activator, zinc cluster DNA-binding protein                                                                                      | 0.75 | -269 | -249 | -259 | - | 0.752 | 0.772 | 0.022 | aggtgggGTAAtaacggaaa     |              |
| FSDNA  | rDNA binding factor                                              | FSREB1.02   | rDNA enhancer binding protein 1, termination factor for RNA polymerase I and transcription factor for RNA polymerase II                       | 0.85 | -262 | -250 | -256 | + | 1     | 0.823 | 0.073 | htaTACcccacc             |              |
| FSYNCM | Yeast cell cycle and metabolic regulator                         | FSMCM1.02   | Yeast factor MCM1 cooperating with MATalpha factors                                                                                           | 0.75 | -258 | -250 | -254 | - | 1     | 0.776 | 0.026 | ctTCGagagaggaat          |              |
| FSYMG  | Yeast GC-Box Proteins                                            | FSMIG1.01   | MIG1, zinc finger protein mediates glucose repression                                                                                         | 0.84 | -260 | -244 | -252 | - | 1     | 0.843 | 0.003 | cacttccaggtGGGtaat       | -268 to -242 |
| FSYADR | Yeast metabolic regulator                                        | FSADR1.01   | Alcohol Dehydrogenase Regulator, carbon source-responsive zinc-finger transcription factor                                                    | 0.94 | -260 | -242 | -251 | + | 1     | 1     | 0.06  | taCCCacc                 |              |
| FMSGCM | Monomeric Gal4-class motifs                                      | FSGRT1.02   | Glucose-responsive transcription factor involved in regulation of glucose transport                                                           | 0.87 | -239 | -223 | -231 | - | 1     | 0.956 | 0.086 | atcccCGGAaattctg         | -239 to -221 |
| FSYMG  | Yeast GC-Box Proteins                                            | FSMIG1.01   | MIG1, zinc finger protein mediates glucose repression                                                                                         | 0.84 | -239 | -221 | -230 | + | 1     | 0.854 | 0.014 | cagaatttccGGGatta        |              |
| FICGG  | Inverted CGG triplets spaced preferentially by 10 bp             | FSTEA1.01   | Ty1 enhancer activator, zinc cluster DNA-binding protein                                                                                      | 0.75 | -232 | -224 | -228 | - | 0.752 | 0.774 | 0.024 | attatccGTAAtcccggaaa     |              |
| FSARPU | Regulator of pyrimidine and purine utilization pathway           | FSPPR1.01   | Pyrimidine pathway regulator 1                                                                                                                | 0.73 | -231 | -223 | -227 | - | 0.75  | 0.739 | 0.009 | atccgtaatccCGGaa         |              |
| FSPDRE | Pleiotropic drug resistance responsive elements                  | FSPDRE.01   | Pleiotropic drug resistance responsive element (yeast)                                                                                        | 0.87 | -232 | -216 | -224 | - | 0.773 | 0.904 | 0.034 | TCCcgaaa                 |              |
| FSARPU | Regulator of pyrimidine and purine utilization pathway           | FSPPR1.01   | Pyrimidine pathway regulator 1                                                                                                                | 0.73 | -231 | -215 | -223 | + | 0.75  | 0.798 | 0.068 | tcgggggattaCGGata        |              |
| FSPDRE | Pleiotropic drug resistance responsive elements                  | FSPDRE.01   | Pleiotropic drug resistance responsive element (yeast)                                                                                        | 0.87 | -230 | -216 | -223 | + | 1     | 0.942 | 0.072 | TCCGgggat                |              |
| FSCYTO | Activator of cytochrome C                                        | FSHAP1.01   | HAP1, S. cerevisiae member of GAL family, regulates heme dependent cytochrome expression                                                      | 0.76 | -233 | -213 | -223 | + | 0.75  | 0.892 | 0.132 | ccgggaatTACGaat          |              |
| FSYQA1 | Neurospora crassa QA1 gene activator                             | FSQA1F.01   | qa-1F, required for quinic acid induction of transcription in the qa gene cluster                                                             | 0.75 | -228 | -208 | -218 | + | 0.794 | 0.753 | 0.003 | ggggattaccgataAATacggt   |              |
| FMSGCM | Monomeric Gal4-class motifs                                      | FSGRT1.02   | Glucose-responsive transcription factor involved in regulation of glucose transport                                                           | 0.87 | -225 | -209 | -217 | + | 1     | 0.906 | 0.036 | gattaCGGataatcgg         | -220 to -209 |
| FSCYTO | Activator of cytochrome C                                        | FSHAP1.01   | HAP1, S. cerevisiae member of GAL family, regulates heme dependent cytochrome expression                                                      | 0.76 | -221 | -207 | -214 | + | 0.75  | 0.793 | 0.033 | acggataatTACGgtg         |              |
| FSBZIP | Fungal basic leucine zipper family                               | FSCIN5.01   | bZIP transcriptional factor of the yAP-1 family that mediates pleiotropic drug resistance and salt tolerance                                  | 0.89 | -208 | -188 | -198 | + | 1     | 0.901 | 0.011 | tggtctgattaatTAATacg     |              |
| FSBZIP | Fungal basic leucine zipper family                               | FSCIN5.01   | bZIP transcriptional factor of the yAP-1 family that mediates pleiotropic drug resistance and salt tolerance                                  | 0.89 | -203 | -189 | -196 | - | 1     | 0.945 | 0.055 | ctggcgattaatTAAATcca     |              |
| FSHOMD | Homeodomain-containing transcriptional regulators                | FSYOX1.02   | Yeast homeobox 1, homeodomain-containing transcriptional repressor                                                                            | 0.96 | -202 | -188 | -195 | - | 1     | 0.979 | 0.019 | gtataATTaatcc            |              |
| FSHOMD | Homeodomain-containing transcriptional regulators                | FSYOX1.02   | Yeast homeobox 1, homeodomain-containing transcriptional repressor                                                                            | 0.96 | -203 | -183 | -193 | + | 1     | 0.979 | 0.019 | ggattaATTaatcc           |              |
| FSYABF | Yeast ABF factors                                                | FSABF1.04   | ARS (autonomously replicating sequence)-binding factor I                                                                                      | 0.77 | -202 | -184 | -193 | + | 0.755 | 0.794 | 0.024 | ggATTAAaataccgcaa        |              |
| FSPHRR | pH responsive regulators                                         | FSRIM101.01 | Transcriptional repressor involved in response to pH and in cell wall construction                                                            | 0.99 | -192 | -176 | -184 | + | 1     | 1     | 0.01  | atacGCCAagttctaca        |              |
| FSPRES | Pheromone response elements                                      | FSSTE12.01  | Transcription factor activated by a MAP kinase signaling cascade, activates genes involved in mating of pseudohyphal/invasive growth pathways | 0.86 | -175 | -163 | -169 | - | 1     | 0.89  | 0.03  | gactgCAACAaa             |              |
| FSFKHD | Fungal fork head transcription factors                           | FSFKH2.01   | Fork head transcription factor Fkh2                                                                                                           | 0.86 | -148 | -132 | -140 | + | 1     | 0.877 | 0.017 | gcaataaTAAcaaat          |              |
| FSYCAT | Yeast CCAAT binding factors                                      | FSHAP234.01 | Yeast factor complex HAP2/3/5, homolog to vertebrate NF-Y/CP1/CBF                                                                             | 0.86 | -124 | -112 | -118 | - | 1     | 0.937 | 0.077 | ctaatCCAATAaa            |              |
| FSYORE | Yeast olate response elements                                    | FSORE.01    | Olate response element, binding motif of Oaf1 homodimers or Oaf1/Pip2 heterodimers                                                            | 0.72 | -120 | -96  | -108 | - | 0.86  | 0.745 | 0.025 | CGAGGtcaagctgcaactatccaa |              |
| FSAAAU | A. nidulans activator of acetate utilization genes               | FSFACBCB.01 | FACB, activator of acetate utilization genes with a GAL4-type Zn(II)2Cys6 zinc binuclear cluster                                              | 0.8  | -109 | -93  | -101 | + | 1     | 0.816 | 0.016 | CGAGGtaccgcccga          |              |
| FSYMG  | Yeast GC-Box Proteins                                            | FSMIG3.01   | Zinc finger transcriptional repressor MIG3                                                                                                    | 0.81 | -104 | -86  | -95  | - | 1     | 0.86  | 0.05  | ctagctatggcGGGtcaa       |              |
| FSYRAP | Yeast activator of glycolysis genes / repressor of mating type I | FSRAP1.06   | RAP1 (TUF1), activator or repressor depending on context                                                                                      | 0.94 | -74  | -52  | -63  | - | 1     | 0.972 | 0.032 | tgcatcatctaaCACcctagca   |              |
| FSPHD1 | Pseudoh yphal determinant 1                                      | FSPHD1.03   | Transcription factor involved in regulation of filamentous growth                                                                             | 0.98 | -60  | -48  | -54  | - | 1     | 0.994 | 0.014 | caaGTGCatcatc            |              |
| OSVTBP | Vertebrate TATA binding protein factor                           | OSVTATA.01  | Cellular and viral TATA box elements                                                                                                          | 0.9  | -31  | -15  | -23  | + | 1     | 0.974 | 0.074 | gaataTAAaagatcct         |              |
| FMSGCM | Monomeric Gal4-class motifs                                      | FSLYS14.01  | Transcriptional activator involved in regulation of genes of the lysine biosynthesis pathway                                                  | 0.8  | -17  | -1   | -9   | - | 1     | 0.838 | 0.038 | aaaggtGGAAttaag          |              |
