# Supplementary material for: Superior protein titers in half the fermentation time: Promoter and process engineering for the glucose‐regulated GTH1 promoter of Pichia pastoris
Source: PubMed Central journal article supplement — Biotechnol Bioeng. 2018 Aug 8;115(10):2479–88. doi: 10.1002/bit.26800 (PMC6221138; doi:10.1002/bit.26800), 2018-08-08
Supplement: BIT-115-2479-s003.pdf [file BIT-115-2479-s003.pdf]

Table S2: List of primers.

| #  | Name            | Product            | Sequence                                               | T <sub>M</sub> | Site  |
|----|-----------------|--------------------|--------------------------------------------------------|----------------|-------|
| 1  | PGTH1 fw        | PGTH1              | GATAGGGCCCCAAACATTTGCTCCCCCTAGTCTC                     | 71             | Apal  |
| 2  | PGTH1 back      | PGTH1/PGTH1-s      | GATACCTGCAGGAAGGGTGAATTTAAGGATCTTTA                    | 70             | Sbfl  |
| 3  | PGTH1-858 fw    | PGTH1-s858         | GATAGGGCCCCGGAATCTGTATTGTTAGAAAGAACGAGA                | 71             | Apal  |
| 4  | PGTH1-663 fw    | PGTH1-s663         | GATAGGGCCCCATATTCAGTAGGTGTTTCTTGCA                     | 69             | Apal  |
| 5  | PGTH1-492 fw    | PGTH1-s492         | GATAGGGCCCCGAGATAGACTTCAAGATCTCAGC                     | 69             | Apal  |
| 6  | PGTH1-371 fw    | PGTH1-s371         | GATAGGGCCCCGACCCGTTTTCTGACAAAT                         | 70             | Apal  |
| 7  | PGTH1-328 fw    | PGTH1-s328         | GATAGGGCCCCGGATAAGAGAATTTTGTGTTGATTA                   | 70             | Apal  |
| 8  | PGTH1-283 fw    | PGTH1-s283         | GATAGGGCCCCGCTGCTCCATATTTTCCGC                         | 71             | Apal  |
| 9  | PGTH1-211 fw    | PGTH1-s211         | GATAGGGCCCCGGTGGATTAATTAATAC                           | 68             | Apal  |
| 10 | PGTH1-66 fw     | PGTH1-s66          | GATAGGGCCCCGTGTTAGATGATGCACTGGATG                      | 68             | Apal  |
| 11 | PGTH1-Δ1 fw     | PGTH1-Δ1           | GAAAACAGCTTGAACTTTCAAAGGTTCTGTTGCTATACACGAA            | 69             | -     |
| 12 | PGTH1-Δ1 bw     | PGTH1-Δ1           | GTTCTGTATAGCAACAGAACCCTTGAAGTCAAGCTGTTTTCACACGGCC      | 68             | -     |
| 13 | PGTH1-Δ2 fw     | PGTH1-Δ2           | GTAGGTGTTTCTTGCACTTTGCACTCCAATAGCGGTTTCATATGC          | 67             | -     |
| 14 | PGTH1-Δ2 bw     | PGTH1-Δ2           | GCATATGAAACGCGCTATTGTCATGCAAAAGTGCAAGAAACACCTA         | 68             | -     |
| 15 | PGTH1-Δ3 fw     | PGTH1-Δ3           | CGCGTTTCATATGCGCTGCGCAAAATGCTGTAAGATTTC                | 68             | -     |
| 16 | PGTH1-Δ3 bw     | PGTH1-Δ3           | CAAACTTACAGGCATTTGCG(AAGCGCATATGAAACGCG                | 65             | -     |
| 17 | PGTH1-Δ4 fw     | PGTH1-Δ4           | GTCAGCGCAAAATGCCTGGAGCCGTTAGCTGAAGTACAACAC             | 65             | -     |
| 18 | PGTH1-Δ4 bw     | PGTH1-Δ4           | CTGTTGACTTCAGCTAACGCTCAGGCATTTGCGCTTGAC                | 67             | -     |
| 19 | PGTH1-Δ5 fw     | PGTH1-Δ5           | GGGATTCCTACTATTTGGTATTCTGCATCAAACTCTAATCTAAACCTGAATCT  | 67             | -     |
| 20 | PGTH1-Δ5 bw     | PGTH1-Δ5           | GAGATTGAGTTTTAGATTAGAGTTTTGATGTCAGAATACCAAATAGTGGAATCC | 68             | -     |
| 21 | PGTH1-Δ6 fw     | PGTH1-Δ6           | GTTTTCGTGACAAATTAATTTCCAACITTTGTTGATTATCCGTTCCG        | 65             | -     |
| 22 | PGTH1-Δ6 bw     | PGTH1-Δ6           | CCGAACGGATAATCAAACAAAACGTTGGAAATTAATTTGTCACGAAAA       | 68             | -     |
| 23 | PGTH1-Δ7 fw     | PGTH1-Δ7           | CCGGATAAGAGAATTTTTCGGATAAATGGACGCGCTC                  | 67             | -     |
| 24 | PGTH1-Δ7 bw     | PGTH1-Δ7           | CAGGCTCCATTTATCCGAACAAATTCCTTATCCGGACAAGAC             | 68             | -     |
| 25 | PGTH1-Δ8 fw     | PGTH1-Δ8           | GAATTTGTTTTGATTATCCGTTCCGCGCTGCTCCATATTTTCCG           | 70             | -     |
| 26 | PGTH1-Δ8 bw     | PGTH1-Δ8           | CGGAAAATATGGAGCAGGCCCGAACGGATAATCAAACAAAAT             | 67             | -     |
| 27 | PGTH1-Δ9 fw     | PGTH1-Δ9           | CGGATAAATGGACGCTGCTATTACCCACCTGGAAGTGCC                | 68             | -     |
| 28 | PGTH1-Δ9 bw     | PGTH1-Δ9           | GGCACTTCCAGGTGGGGTAATGAGCAGGCGTCCATTTATCCG             | 70             | -     |
| 29 | PGTH1-Δ10 fw    | PGTH1-Δ10          | GCCTGCTCCATATTTTCCGGTTA'CCCAGAATTTTCCG                 | 53             | -     |
| 30 | PGTH1-Δ10 bw    | PGTH1-Δ10          | CGGAAAATCTGGGATAACCGGAAAAATATGGAGCAGG                  | 69             | -     |
| 31 | PGTH1-Δ11 fw    | PGTH1-Δ11          | TATTACCCACCTGGAAGTGCCGGATAATACGGTGGTCTGGATTAA          | 67             | -     |
| 32 | PGTH1-Δ11 bw    | PGTH1-Δ11          | ATTAATCCAGACCACCGTATTATTCGGCACTTCCAGGTGGGTAATA         | 68             | -     |
| 33 | PGTH1-Δ12 fw    | PGTH1-Δ12          | CCAGAATTTTCCGGGGATT'GGTCTGGATTAATTAATACGCCAAGT         | 68             | -     |
| 34 | PGTH1-Δ12 bw    | PGTH1-Δ12          | GACTTGGCGTATTAATTAATCCAGACCTAATCCCGGAAAATCTGC          | 65             | -     |
| 35 | PGTH1-ΔTAT14 fw | PGTH1-ΔT14         | CAAACTCTAATCTAAACCTGAATCTCCGGATGACCCCGTTTTCTGTGAC      | 67             | -     |
| 36 | PGTH1-ΔTAT14 bw | PGTH1-ΔT14         | GTCACGAAAACGGGGTCACTGCGGAGATT'GAGTTTTAGATTAGAGTTTT     | 69             | -     |
| 37 | PGTH1-TAT18 fw  | PGTH1-T18          | CCTGAATCTCCGCTTTTTTTTTTTTTTTTGTGACCCC                  | 70             | -     |
| 38 | PGTH1-TAT18 bw  | PGTH1-T18          | GGGGGTCATCAAAAAAAAAAAAAAAAAAAGCGGAGATT'GAG             | 70             | -     |
| 39 | PGTH1-TAT20 fw  | PGTH1-T20          | CCTGAATCTCCGCTTTTTTTTTTTTTTTTGTGACCCC                  | 70             | -     |
| 40 | PGTH1-TAT20 bw  | PGTH1-T20          | GGGGGTCATCAAAAAAAAAAAAAAAAAAAGCGGAGATT'GAG             | 70             | -     |
| 41 | PGTH1-TAT22 fw  | PGTH1-T22          | CCTGAATCTCCGCTTTTTTTTTTTTTTTTGTGACCCC                  | 70             | -     |
| 42 | PGTH1-TAT22 bw  | PGTH1-T22          | GGGGGTCATCAAAAAAAAAAAAAAAAAAAGCGGAGATT'GAG             | 70             | -     |
| 43 | PGTH1-d-472 fw  | PGTH1-d1240/-d1427 | GATACTGCAGCTCAGGGATCCCACTATTTGGTATT                    | 68             | PstI  |
| 44 | PGTH1-d-188 bw  | PGTH1-d1240        | GATAGATCTCGTATTAATTAATCCAGACCACC                       | 64             | BglII |
| 45 | PGTH1-d-1 bw    | PGTH1-d1427        | GATAGATCTAAGGGTGAATTTAAGGATCTTTA                       | 64             | BglII |
