# Supplementary material for: Superior protein titers in half the fermentation time: Promoter and process engineering for the glucose‐regulated GTH1 promoter of Pichia pastoris
Source: PubMed Central journal article supplement — Biotechnol Bioeng. 2018 Aug 8;115(10):2479–88. doi: 10.1002/bit.26800 (PMC6221138; doi:10.1002/bit.26800), 2018-08-08
Supplement: BIT-115-2479-s004.pdf [file BIT-115-2479-s004.pdf]

Table S3: List of putative TFBS affected in the deletions shown in Figure 4.

| Colour code, Deletion Δ | Position     | Matrix Family | Detailed Family Information                                     | Matrix      | Detailed Matrix Information                                                                                                                   |
|-------------------------|--------------|---------------|-----------------------------------------------------------------|-------------|-----------------------------------------------------------------------------------------------------------------------------------------------|
| 1                       | -785 to -777 | F\$YADR       | Yeast metabolic regulator                                       | F\$ADR1.01  | Alcohol Dehydrogenase Regulator, carbon source-responsive zinc-finger transcription factor                                                    |
|                         |              | F\$PHD1       | Pseudoh yphal determinant 1                                     | F\$PHD1.03  | Transcription factor involved in regulation of filamentous growth                                                                             |
| 2                       | -628 to -612 | F\$MGCM       | Monomeric Gal4-class motifs                                     | F\$RGT1.02  | Glucose-responsive transcription factor involved in regulation of glucose transporters                                                        |
|                         |              | F\$CSRE       | Carbon source-responsive elements                               | F\$CSRE.01  | Carbon source-responsive element (yeast)                                                                                                      |
|                         |              | F\$RDNA       | RDNA binding factor                                             | F\$REB1.02  | rDNA enhancer binding protein 1, termination factor for RNA polymerase I and transcription factor for RNA polymerase II                       |
| 3                       | -586 to -568 | F\$YMIG       | Yeast GC-Box Proteins                                           | F\$MIG1.02  | MIG1, zinc finger protein mediates glucose repression                                                                                         |
|                         |              | F\$YSTR       | Yeast stress response elements                                  | F\$MSN2.01  | Transcriptional activator for genes in multistress response                                                                                   |
|                         |              | F\$BZIP       | Fungal basic leucine zipper family                              | F\$YAP1.02  | Yeast activator protein of the basic leucine zipper (bZIP) family                                                                             |
|                         |              | F\$TALE       | Fungal TALE homeodomain class                                   | F\$TOS8.01  | Homeodomain-containing transcription factor                                                                                                   |
| 4                       | -553 to -535 | F\$YMIG       | Yeast GC-Box Proteins                                           | F\$MIG1.01  | MIG1, zinc finger protein mediates glucose repression                                                                                         |
|                         |              | F\$YRAP       | Yeast activator of glycolyse genes / repressor of mating type I | F\$RAP1.06  | RAP1 (TUF1), activator or repressor depending on context                                                                                      |
|                         |              | F\$IRTF       | Iron-responsive transcriptional activators                      | F\$AFT2.01  | Activator of Fe (iron) transcription 2, iron-regulated transcriptional activator                                                              |
| 5                       | -442 to -426 | F\$MGCM       | Monomeric Gal4-class motifs                                     | F\$RGT1.02  | Glucose-responsive transcription factor involved in regulation of glucose transporters                                                        |
|                         |              | F\$GATA       | Fungal GATA binding factors                                     | F\$GZF3.01  | GATA zinc finger protein Gzf3                                                                                                                 |
|                         |              | F\$PHD1       | Pseudoh yphal determinant 1                                     | F\$PHD1.01  | Transcription factor involved in regulation of filamentous growth                                                                             |
|                         |              | F\$ASG1       | Activator of stress genes                                       | F\$ASG1.01  | Fungal zinc cluster transcription factor Asg1                                                                                                 |
| 6                       | -337 to -316 | F\$MGCM       | Monomeric Gal4-class motifs                                     | F\$RGT1.02  | Glucose-responsive transcription factor involved in regulation of glucose transporters                                                        |
|                         |              | F\$MGCM       | Monomeric Gal4-class motifs                                     | F\$RGT1.02  | Glucose-responsive transcription factor involved in regulation of glucose transporters                                                        |
|                         |              | F\$RDR1       | Repressor of Drug Resistance 1                                  | F\$RDR1.01  | Repressor of Drug Resistance 1 (transcriptional repressor involved in the control of multidrug resistance)                                    |
|                         |              | F\$GATA       | Fungal GATA binding factors                                     | F\$GATA.01  | GATA binding factor (yeast)                                                                                                                   |
|                         |              | F\$PRES       | Pheromone response elements                                     | F\$STE12.01 | Transcription factor activated by a MAP kinase signaling cascade, activates genes involved in mating or pseudohyphal/invasive growth pathways |
|                         |              | F\$GATA       | Fungal GATA binding factors                                     | F\$GAT1.01  | GATA-type Zn finger protein Gat1                                                                                                              |
| 7                       | -310 to -299 | F\$MGCM       | Monomeric Gal4-class motifs                                     | F\$RGT1.02  | Glucose-responsive transcription factor involved in regulation of glucose transporters                                                        |
|                         |              | O\$MTEN       | Core promoter motif ten elements                                | O\$DMTE.01  | Drosophila motif ten element                                                                                                                  |
|                         |              | F\$YORE       | Yeast oleate response elements                                  | F\$OAF1.01  | Oleate-activated transcription factor, acts alone and as a heterodimer with Pip2p                                                             |
|                         |              | F\$MGCM       | Monomeric Gal4-class motifs                                     | F\$RGT1.02  | Glucose-responsive transcription factor involved in regulation of glucose transporters                                                        |
|                         |              | F\$YGAL       | Yeast GAL4 factor                                               | F\$GAL4.01  | GAL4 transcriptional activator in response to galactose induction                                                                             |
| 8                       | -293 to -285 | F\$CSRE       | Carbon source-responsive elements                               | F\$SIP4.01  | Zinc cluster transcriptional activator, binds to the carbon source-responsive element (CSRE) of gluconeogenic genes                           |
|                         |              | F\$RDR1       | Repressor of Drug Resistance 1                                  | F\$RDR1.01  | Repressor of Drug Resistance 1 (transcriptional repressor involved in the control of multidrug resistance)                                    |
|                         |              | F\$YGAL       | Yeast GAL4 factor                                               | F\$LAC9.01  | LAC9 binding site, homologous to GAL4 of Saccharomyces cerevisiae                                                                             |
|                         |              | F\$FBAS       | Fungi branched amino acid biosynthesis                          | F\$LEU3.02  | LEU3, S. cerevisiae, zinc cluster protein                                                                                                     |
| 9                       | -275 to -261 | F\$CSRE       | Carbon source-responsive elements                               | F\$CSRE.01  | Carbon source-responsive element (yeast)                                                                                                      |
|                         |              | F\$MGCM       | Monomeric Gal4-class motifs                                     | F\$RGT1.01  | Glucose-responsive transcription factor involved in regulation of glucose transporters                                                        |
|                         |              | F\$ICGG       | Inverted CGG triplets spaced preferentially by 10 bp            | F\$TEA1.01  | Ty1 enhancer activator, zinc cluster DNA-binding protein                                                                                      |
|                         |              | F\$RDNA       | RDNA binding factor                                             | F\$REB1.02  | rDNA enhancer binding protein 1, termination factor for RNA polymerase I and transcription factor for RNA polymerase II                       |
|                         |              | F\$YMCM       | Yeast cell cycle and metabolic regulator                        | F\$MCM1.02  | Yeast factor MCM1 cooperating with MATalpha factors                                                                                           |
| 10                      | -258 to -242 | F\$YMIG       | Yeast GC-Box Proteins                                           | F\$MIG1.01  | MIG1, zinc finger protein mediates glucose repression                                                                                         |
|                         |              | F\$YADR       | Yeast metabolic regulator                                       | F\$ADR1.01  | Alcohol Dehydrogenase Regulator, carbon source-responsive zinc-finger transcription factor                                                    |
| 11                      | -239 to -221 | F\$MGCM       | Monomeric Gal4-class motifs                                     | F\$RGT1.02  | Glucose-responsive transcription factor involved in regulation of glucose transporters                                                        |
|                         |              | F\$YMIG       | Yeast GC-Box Proteins                                           | F\$MIG1.01  | MIG1, zinc finger protein mediates glucose repression                                                                                         |
|                         |              | F\$ICGG       | Inverted CGG triplets spaced preferentially by 10 bp            | F\$TEA1.01  | Ty1 enhancer activator, zinc cluster DNA-binding protein                                                                                      |
|                         |              | F\$ARPU       | Regulator of pyrimidine and purine utilization pathway          | F\$PPR1.01  | Pyrimidine pathway regulator 1                                                                                                                |
|                         |              | F\$PDRE       | Pleiotropic drug resistance responsive elements                 | F\$PDRE.01  | Pleiotropic drug resistance responsive element (yeast)                                                                                        |

|    |              |         |                                                        |                   |                                                                                                 |
|----|--------------|---------|--------------------------------------------------------|-------------------|-------------------------------------------------------------------------------------------------|
|    |              | F\$ARPU | Regulator of pyrimidine and purine utilization pathway | F\$PPR1.01        | Pyrimidine pathway regulator 1                                                                  |
|    |              | F\$PDRE | Pleiotropic drug resistance responsive elements        | F\$PDRE.01        | Pleiotropic drug resistance responsive element (yeast)                                          |
|    |              | F\$CYTO | Activator of cytochrome C                              | F\$HAP1.01        | HAP1, <i>S. cerevisiae</i> member of GAL family, regulates heme dependent cytochrome expression |
|    |              | F\$YQA1 | <i>Neurospora crassa</i> QA1 gene activator            | F\$QA1F.01        | qa-1F, required for quinic acid induction of transcription in the qa gene cluster               |
| 12 | -220 to -209 | F\$MGCM | <b>Monomeric Gal4-class motifs</b>                     | <b>F\$RGT1.02</b> | <b>Glucose-responsive transcription factor involved in regulation of glucose transporters</b>   |
|    |              | F\$CYTO | Activator of cytochrome C                              | F\$HAP1.01        | HAP1, <i>S. cerevisiae</i> member of GAL family, regulates heme dependent cytochrome expression |
